# Supplementary material
Source: Springer Nature journal article supplement (https://www.springermedizin.de/resource/supplementary/12985_2014_2483_MOESM5_ESM.pdf/9606846)

**Segment 1 (PB2)**

A B C D

**Segment 2 (PB1)**

A B C D

**Segment 3 (PA)**

A B C D

1kb  
800bp  
600bp  
400bp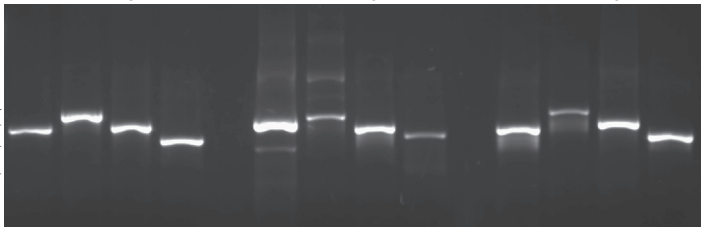**Segment 4 (HA)**

A B C D

**Segment 5 (NP)**

A B C

**Segment 6 (NA)**

A B C

1kb  
800bp  
600bp  
400bp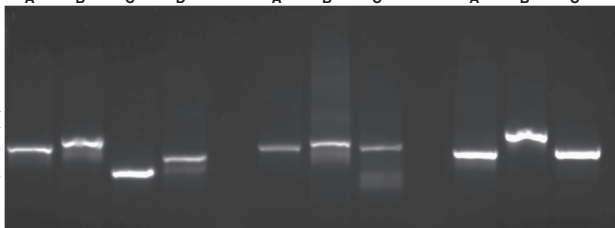**Segment 7 (M)**

A B

**Segment 8 (NS)**

A B

1kb  
800bp  
600bp  
400bp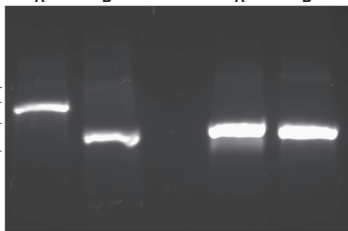

Supplement: MOESM5 [file 9606846]
